# Supplementary material for: Urinary Volatile Compounds as Biomarkers for Lung Cancer: A Proof of Principle Study Using Odor Signatures in Mouse Models of Lung Cancer
Source: PLOS journal article supplement (doi:10.1371/journal.pone.0008819), 2010-01-26

Figure S1 Image plot of total ion chromatograms

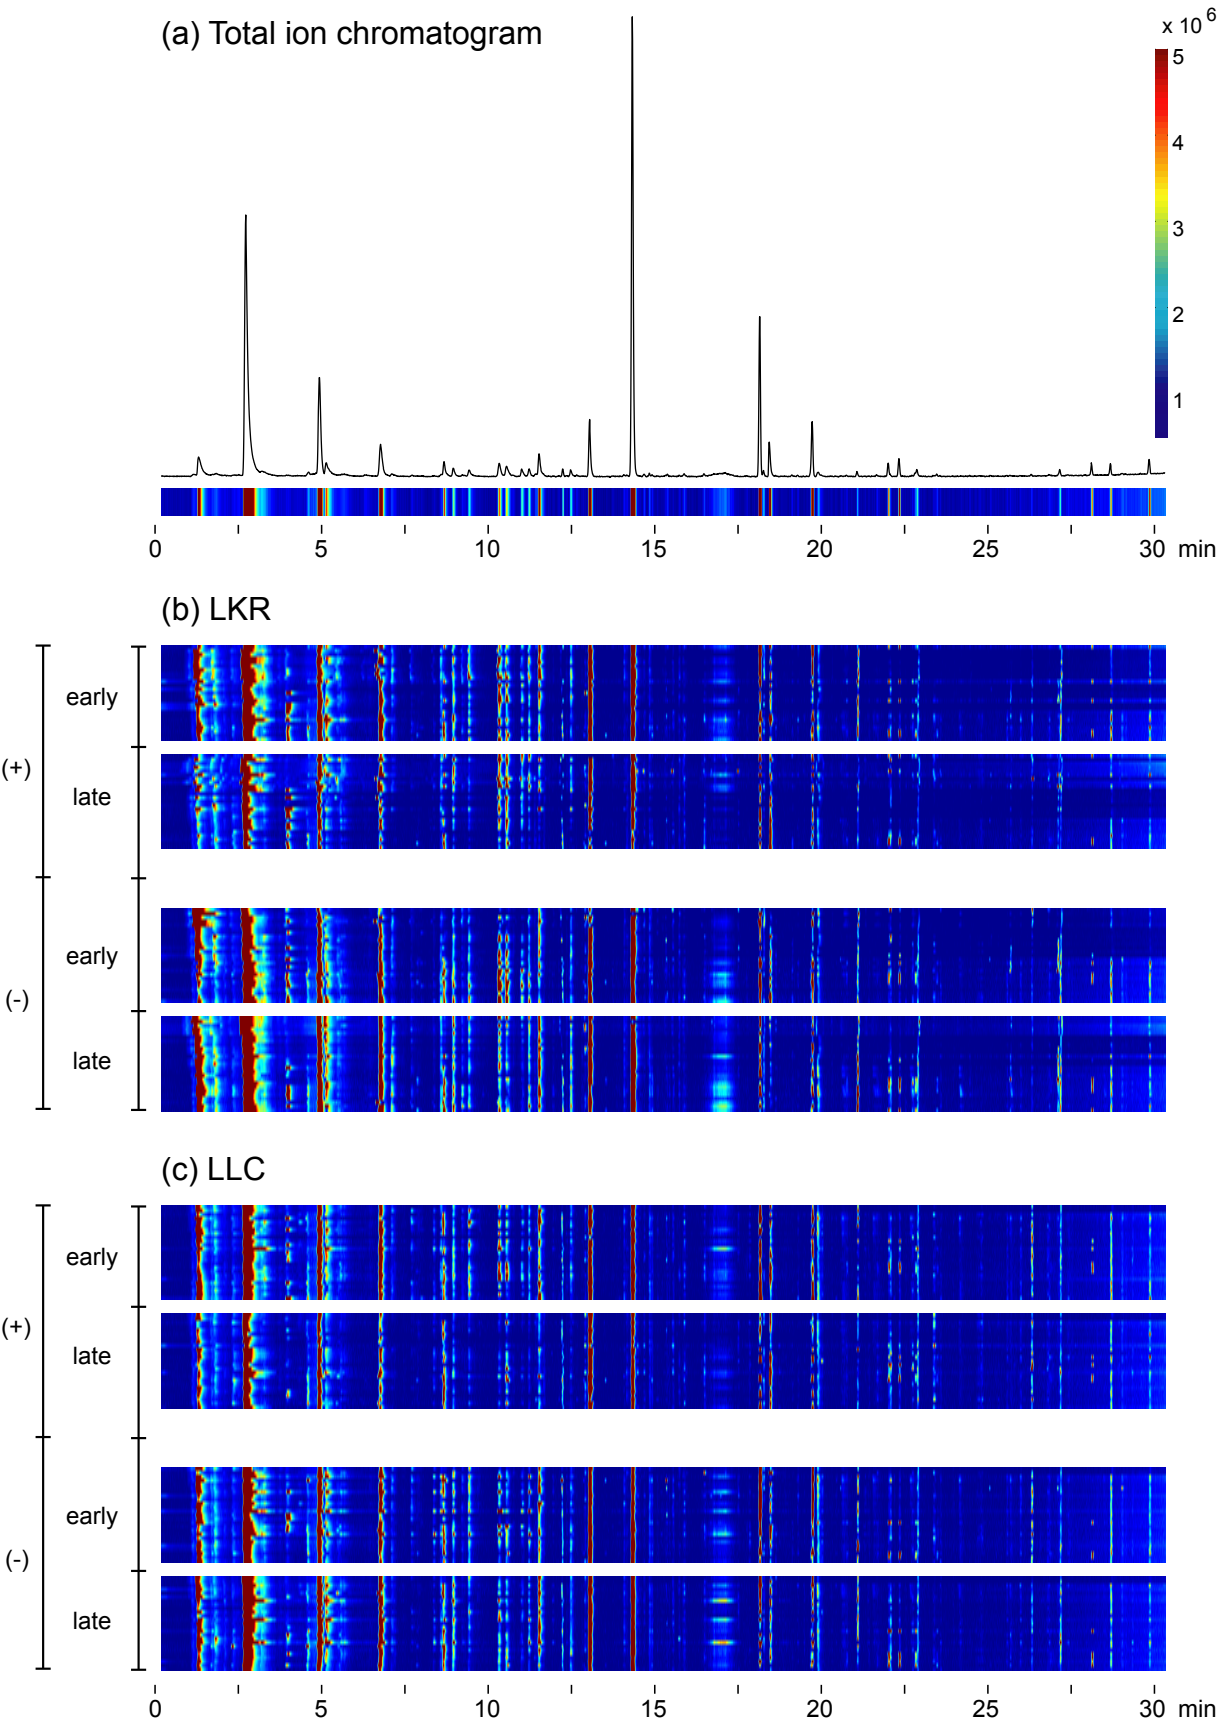

Supplement: S1 (10.1371/journal.pone.0008819.s001) [file journal.pone.0008819.s001]
